# Supplementary material for: Life cycle assessment of nutrient recovery strategies from domestic wastewaters to quantify environmental performance and identification of trade-offs
Source: PubMed Central journal article supplement (PMC10867002; doi:10.1038/s41598-024-54060-6), 2024-02-14
Supplement: 41598_2024_54060_MOESM1_ESM.pdf [file 41598_2024_54060_MOESM1_ESM.pdf]

## Life cycle assessment of nutrient recovery strategies from domestic wastewaters to quantify environmental performance and identification of trade-offs

Authors: Carla Mae Pausta<sup>1</sup>, Pradip Kalbar<sup>2</sup>, and Devendra Saroj<sup>1\*</sup>

<sup>1</sup>Centre for Environmental Health and Engineering (CEHE), School of Sustainability, Civil and Environmental Engineering, University of Surrey, Guildford GU2 7XH United Kingdom

<sup>2</sup>Centre for Urban Science and Engineering (CUSE), Indian Institute of Technology Bombay, Powai, Mumbai, 400076, India

\*Corresponding author: d.saroj@surrey.ac.uk

### Supplementary Information

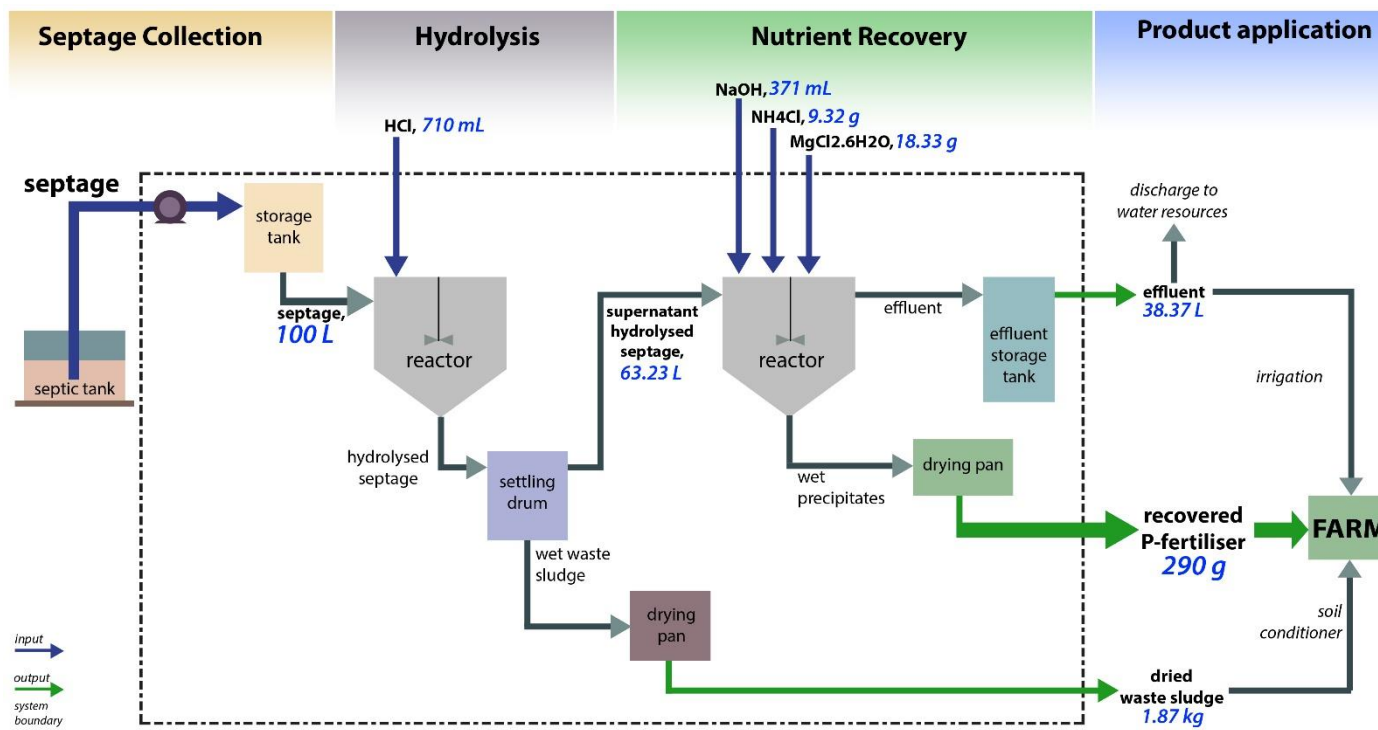

Figure S1. Process flow diagram with material balance for Scenario 3 (integration of nutrient recovery system) inventory (Pausta et al., 2023)

Table S1. Statistics on population and households, and calculated data domestic wastewater treatment routes within the geographical boundary (ie. Sewage Treatment Plants, STP; and septic tanks) (Philippines Statistics Authority, 2021)

| Geographical Boundary                                 | Population        | Households       | <i>Households connected to:</i> |                  |
|-------------------------------------------------------|-------------------|------------------|---------------------------------|------------------|
|                                                       |                   |                  | Septic Tanks                    | STP              |
| Metro Manila                                          | 13,484,462        | 3,288,893        | 2,302,225                       | 986,668          |
| Laguna                                                | 3,382,193         | 915,398          | 915,398                         | 204,316          |
| Rizal                                                 | 3,330,143         | 784,402          | 784,402                         |                  |
| <i>Cavite</i>                                         |                   |                  |                                 |                  |
| Silang                                                | 295,644           | 71,463           | 71,463                          |                  |
| Carmona                                               | 106,256           | 28,154           | 28,154                          |                  |
| General Mariano Alvarez                               | 172,433           | 41,233           | 41,233                          |                  |
| Tagaytay City                                         | 85,330            | 22,399           | 22,399                          |                  |
| <i>Batangas</i>                                       |                   |                  |                                 |                  |
| Tanauan City                                          | 193,936           | 46,680           | 46,680                          |                  |
| Malvar                                                | 64,379            | 17,064           | 17,064                          |                  |
| Sto. Tomas                                            | 218,500           | 59,686           | 59,686                          |                  |
| <i>Quezon</i>                                         |                   |                  |                                 |                  |
| Lucban                                                | 53,091            | 12,692           | 12,692                          |                  |
| <b>TOTAL</b>                                          | <b>21,386,367</b> | <b>5,288,064</b> | <b>4,086,326</b>                | <b>1,190,984</b> |
| <i>Percentage contribution of STP and septic tank</i> |                   |                  |                                 |                  |
| STP, %                                                | 23                |                  |                                 |                  |
| Septic Tank, %                                        | 77                |                  |                                 |                  |

Table S2. Water Consumption and calculated septage distribution for every social class members within the geographical boundary (Albert et al., 2018; Philippines Statistics Office, 2021)

| Class                                | Population              | Water consumption<br>L/c/day | Water<br>consumption<br>L/day | Dry g<br>feces/c/day | Dry g<br>feces/day |
|--------------------------------------|-------------------------|------------------------------|-------------------------------|----------------------|--------------------|
| Poor                                 | 12,489,638              | 48                           | 599,502,639.74                | 38                   | 474,606,256        |
| Middle                               | 8,597,320               | 58                           | 498,644,532.97                | 38                   | 326,698,142        |
| High                                 | 299,409                 | 108                          | 32,336,186.90                 | 28                   | 8,383,456          |
| Total water consumption, L           | <b>1,130,483,359.62</b> |                              |                               |                      |                    |
| Drinking water consumption,<br>L/day | 106,931,835             |                              |                               |                      |                    |
| <i>Septic tank input</i>             |                         |                              |                               |                      |                    |
| Total water going to septic tank, L  | 1,023,551,525           |                              |                               |                      |                    |
| Feces, kg                            | 809,688                 |                              |                               |                      |                    |
| Total septage, kg                    | <b>1,024,361,212</b>    |                              |                               |                      |                    |
| Septage/water consumption, %         | <b>90.61</b>            |                              |                               |                      |                    |

Table S3. Detailed life cycle inventory for all the scenarios

|                                                       | Scenario 1 (1 m <sup>3</sup> ) |                  | Scenario 2 (1 m <sup>3</sup> ) |                  | Scenario 3 (1 m <sup>3</sup> ) |                  | Recovered struvite – Scenario 3 input |
|-------------------------------------------------------|--------------------------------|------------------|--------------------------------|------------------|--------------------------------|------------------|---------------------------------------|
|                                                       | STP                            | Septic tank      | STP                            | Septic tank      | STP                            | Septic tank      |                                       |
| Functional Unit                                       | 1 m <sup>3</sup>               | 1 m <sup>3</sup> | 1 m <sup>3</sup>               | 1 m <sup>3</sup> | 1 m <sup>3</sup>               | 1 m <sup>3</sup> | 290 g                                 |
| <b>Materials/fuels</b>                                |                                |                  |                                |                  |                                |                  |                                       |
| Recovered struvite                                    | kg                             | -                | -                              | -                | -                              | 2.90             | -                                     |
| Polyacrylamide                                        | kg                             | 0.0015           | -                              | 0.0208           | -                              | 0.0015           | -                                     |
| Hydrochloric acid (30% <sub>w</sub> )                 | g                              | -                | -                              | -                | -                              | -                | 852                                   |
| Ammonium chloride                                     | g                              | -                | -                              | -                | -                              | -                | 9.32                                  |
| Magnesium chloride hexahydrate                        | g                              | -                | -                              | -                | -                              | -                | 18.33                                 |
| Sodium hydroxide (50% <sub>w</sub> )                  | g                              | -                | -                              | -                | -                              | -                | 61.957                                |
| Distance to chemical suppliers                        | km                             | 60               | -                              | -                | -                              | 60               | 60                                    |
| Transportation, EURO 4                                | kgkm                           | 0.0924           | -                              | 1.248            | -                              | 0.0924           | 60.24                                 |
| Tap Water                                             | kg                             | 1,093.9          | -                              | 1,093.9          | -                              | 1,093.9          | -                                     |
| <b>Avoided Products</b>                               |                                |                  |                                |                  |                                |                  |                                       |
| Phosphate (P <sub>2</sub> O <sub>5</sub> ) fertiliser | g                              | -                | -                              | -                | -                              | 3,540.80         | 58.71                                 |
| Nitrogen (N) fertiliser                               | g                              | -                | -                              | -                | -                              | 765              | 8.265                                 |
| Potassium chloride (NPK 0-0-60)                       | g                              | -                | -                              | -                | -                              | 518.03           | -                                     |
| Water                                                 | kg                             | -                | -                              | -                | -                              | 383.70           | -                                     |
| <b>Electricity</b>                                    |                                |                  |                                |                  |                                |                  |                                       |
| Electricity mix, PH                                   | kWh                            | 9.49             | -                              | 19.98            | -                              | 19.98            | 4.85                                  |
| <b>Emissions to air</b>                               |                                |                  |                                |                  |                                |                  |                                       |
| Carbon dioxide                                        | g                              | 1,880            | -                              | 1,880            | -                              | 1,880            | -                                     |
| Methane                                               | g                              | 0.21             | -                              | 0.21             | -                              | 0.21             | -                                     |
| Dinitrogen monoxide                                   | g                              | -                | -                              | 17.93            | -                              | 17.93            | -                                     |
| <b>Emissions to water</b>                             |                                |                  |                                |                  |                                |                  |                                       |
| BOD, Biological Oxygen Demand                         | g                              | 25               | 1,392                          | 25               | 1,392                          | 25               | 12                                    |
| COD, Chemical Oxygen Demand                           | g                              | 50               | 16,700                         | 50               | 16,700                         | 50               | 71                                    |

|                                 |      |       |        |       |        |                |       |   |
|---------------------------------|------|-------|--------|-------|--------|----------------|-------|---|
| Suspended solids                | g    | 50    | -      | 50    | -      | 50             | 50    | - |
| Ammonia, as N                   | g    | 4     | 103.00 | 2     | 103.00 | 2              | 0.50  | - |
| Nitrate                         | g    | 53    | 14.30  | 7     | 14.30  | 7              | 11.16 | - |
| Phosphate-P                     | g    | 4     | 7.80   | 2     | 7.80   | 2              | 1     | - |
| Arsenic (As)                    | g    | -     | 0.07   | -     | 0.07   | -              | 0.01  | - |
| Calcium (Ca)                    | g    | -     | 544.25 | -     | 544.25 | -              | 1,570 | - |
| Cadmium (Cd)                    | g    | -     | 0.07   | -     | 0.07   | -              | 0.001 | - |
| Chromium (Cr)                   | g    | -     | 0.35   | -     | 0.35   | -              | -     | - |
| Copper (Cu)                     | g    | -     | 0.02   | -     | 0.02   | -              | -     | - |
| Iron (Fe)                       | g    | -     | 207.00 | -     | 207.00 | -              | 0.10  | - |
| Magnesium (Mg)                  | g    | -     | 57.75  | -     | 57.75  | -              | 77.00 | - |
| Manganese (Mn)                  | g    | -     | 7.95   | -     | 7.95   | -              | -     | - |
| Nickel (Ni)                     | g    | -     | 0.43   | -     | 0.43   | -              | -     | - |
| Lead (Pb)                       | g    | -     | 1.10   | -     | 1.10   | -              | 0.01  | - |
| Zinc (Zn)                       | g    | -     | 43.75  | -     | 43.75  | -              | 0.03  | - |
| <b><i>Emissions to soil</i></b> |      |       |        |       |        |                |       |   |
| Arsenic (As)                    | g    | -     | 2.25   | -     | 2.25   | -              | 3.50  | - |
| Calcium (Ca)                    | g    | -     | 16,300 | -     | 16,300 | -              | -     | - |
| Cadmium (Cd)                    | g    | -     | 4.35   | -     | 4.35   | -              | 3.10  | - |
| Iron (Fe)                       | g    | -     | 20,500 | -     | 20,500 | -              | 6,300 | - |
| Magnesium (Mg)                  | g    | -     | 2,270  | -     | 2,270  | -              | 780   | - |
| Lead (Pb)                       | g    | -     | 56     | -     | 56     | -              | 104   | - |
| Zinc (Zn)                       | g    | -     | 3,570  | -     | 3,570  | -              | 2,310 | - |
| Total Phosphorus                | g    | -     | 8,765  | -     | 8,765  | -              | 1,545 | - |
| Total Nitrogen                  | g    | -     | 13,250 | -     | 13,250 | -              | 7,650 | - |
| Potassium                       | g    | -     | 895    | -     | 895    | -              | 271   | - |
| <b><i>Waste</i></b>             |      |       |        |       |        |                |       |   |
| Waste Sludge                    | kg   | 0.22  | 54.41  | 0.26  | 54.41  | <i>avoided</i> |       | - |
| Distance to dumpsites           | km   | 60    | 60     | 60    | 60     | -              |       | - |
| Transportation, EURO 4          | kgkm | 12.90 | 3,265  | 15.60 | 3,265  | -              |       | - |

Table S4. Detailed life cycle inventory for the Philippine Electricity Mix (Department of Energy, 2019)

| <b>Products</b>                                    |             |          |
|----------------------------------------------------|-------------|----------|
| Electricity mix, PH                                | 100         | MJ       |
| <b>Electricity/heat</b>                            |             |          |
| <i>Nonrenewable energy sources</i>                 | <b>70.5</b> | <b>%</b> |
| Electricity production, Anthracite coal            | 14.37       | MJ       |
| Electricity production, Bituminous coal            | 14.37       | MJ       |
| Electricity production, Lignite coal               | 14.37       | MJ       |
| Electricity production, Natural gas                | 12.9        | MJ       |
| Electricity production, Diesel                     | 7.25        | MJ       |
| Electricity production, Residual fuel oil          | 7.25        | MJ       |
| <i>Renewable Energy Sources</i>                    | <b>29.5</b> | <b>%</b> |
| Electricity production, Hydroelectric power plant  | 13.6        | MJ       |
| Electricity production, Solar                      | 5.45        | MJ       |
| Electricity production, Wind power at wind turbine | 1.65        | MJ       |
| Electricity production, geothermal                 | 7           | MJ       |
| Electricity production, biomass                    | 1.8         | MJ       |
| <b>Emissions to air</b>                            |             |          |
| Heat, waste                                        | 18.9        | MJ       |

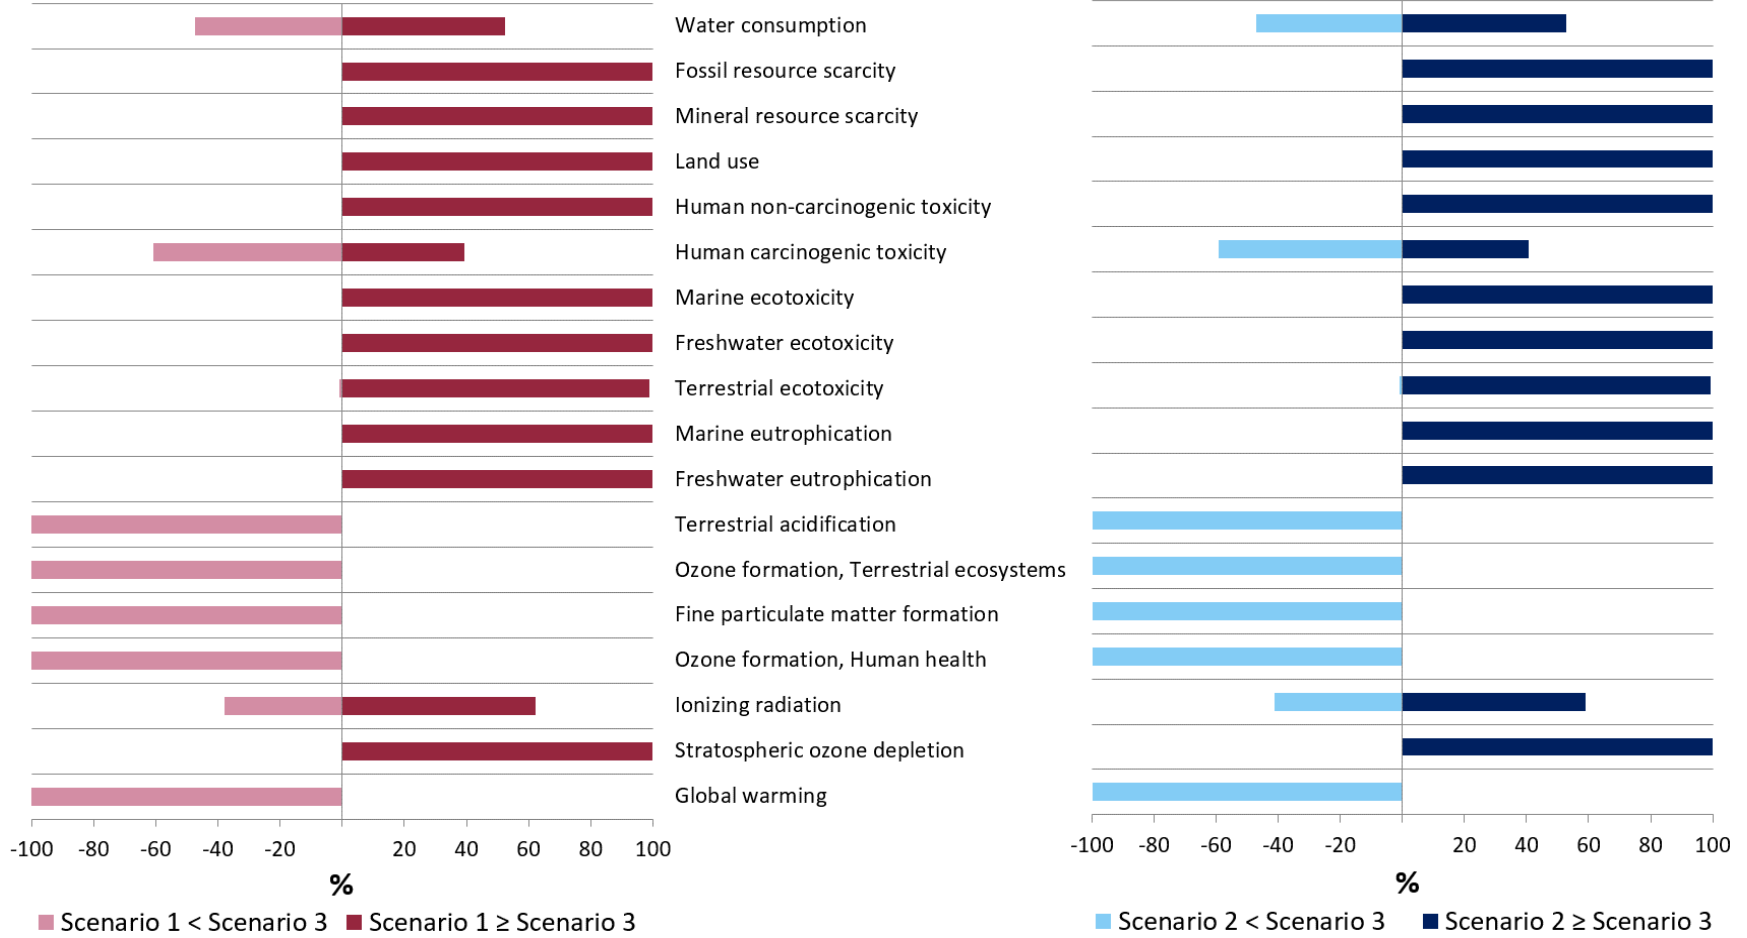

Figure S2. Detailed uncertainty analysis results for a) Scenario 1 and Scenario 3; and b) Scenario 2 and Scenario 3

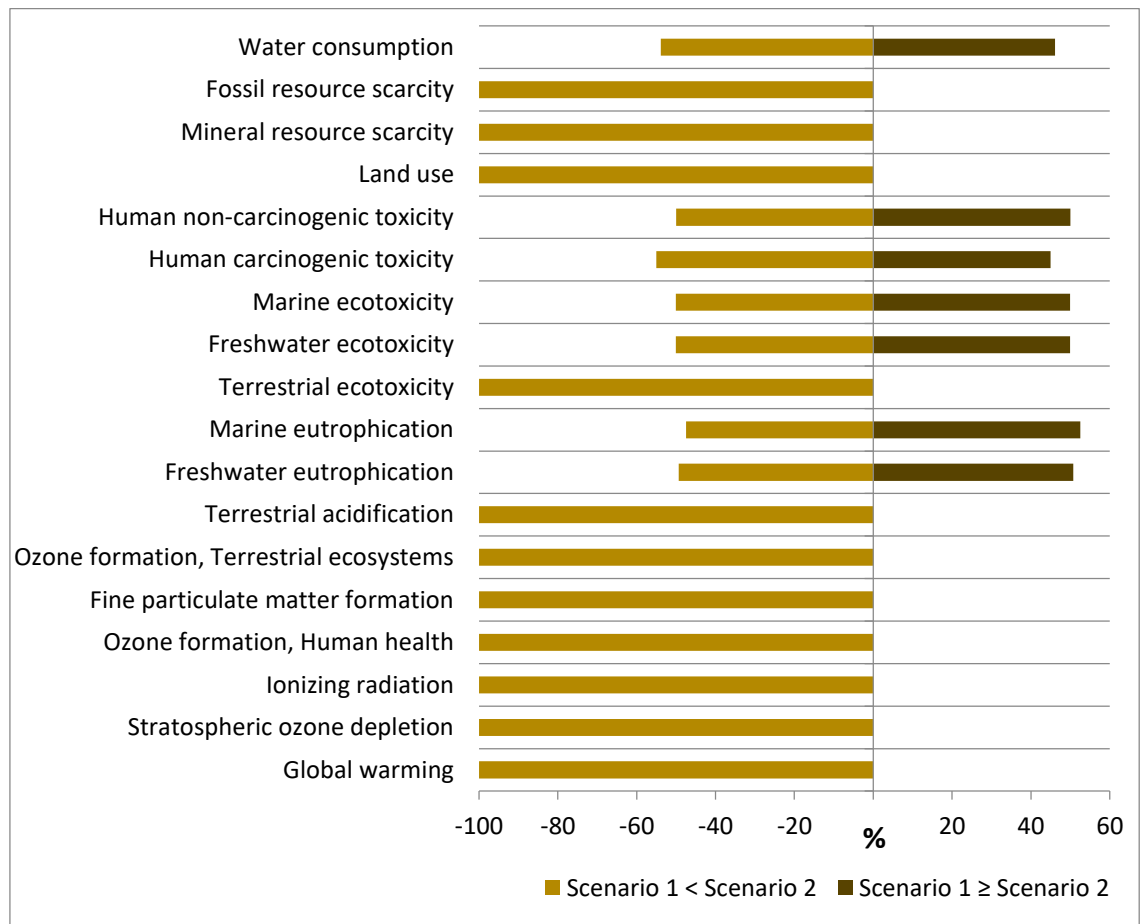

Figure S3. Detailed uncertainty analysis results for Scenario 1 and Scenario 2



Table S5. Sensitivity analysis runs for electricity mix

| Products                                                           |          | Sensitivity Analysis Runs |          |              |              |              |              |              |              |              |              |              |              |              |              |              |              |              |              |              |              |              |              |
|--------------------------------------------------------------------|----------|---------------------------|----------|--------------|--------------|--------------|--------------|--------------|--------------|--------------|--------------|--------------|--------------|--------------|--------------|--------------|--------------|--------------|--------------|--------------|--------------|--------------|--------------|
| Electricity mix, AC, consumption mix, at consumer, < 1kV/PH 100 MJ |          | 1                         | 2        | 3            | 4            | 5            | 6            | 7            | 8            | 9            | 10           | 11           | 12           | 13           | 14           | 15           | 16           | 17           | 18           | 19           | 20           |              |              |
| Electricity/heat                                                   |          |                           |          |              |              |              |              |              |              |              |              |              |              |              |              |              |              |              |              |              |              |              |              |
| <b><i>Nonrenewable energy sources</i></b>                          |          | <b>70.5</b>               | <b>%</b> | <b>66.18</b> | <b>57.55</b> | <b>69.42</b> | <b>64.03</b> | <b>60.79</b> | <b>56.47</b> | <b>52.16</b> | <b>58.63</b> | <b>50.00</b> | <b>62.95</b> | <b>61.87</b> | <b>54.32</b> | <b>68.34</b> | <b>55.39</b> | <b>65.11</b> | <b>53.24</b> | <b>67.26</b> | <b>70.50</b> | <b>59.71</b> | <b>51.08</b> |
| Electricity production, Anthracite coal                            | 14.37 MJ | 13.65                     | 12.21    | 14.19        | 13.29        | 12.75        | 12.03        | 11.31        | 12.39        | 10.95        | 13.11        | 12.93        | 11.67        | 14.01        | 11.85        | 13.47        | 11.49        | 13.83        | 14.37        | 12.57        | 11.13        |              |              |
| Electricity production, Bituminous coal                            | 14.37 MJ | 13.65                     | 12.21    | 14.19        | 13.29        | 12.75        | 12.03        | 11.31        | 12.39        | 10.95        | 13.11        | 12.93        | 11.67        | 14.01        | 11.85        | 13.47        | 11.49        | 13.83        | 14.37        | 12.57        | 11.13        |              |              |
| Electricity production, Lignite coal                               | 14.37 MJ | 13.65                     | 12.21    | 14.19        | 13.29        | 12.75        | 12.03        | 11.31        | 12.39        | 10.95        | 13.11        | 12.93        | 11.67        | 14.01        | 11.85        | 13.47        | 11.49        | 13.83        | 14.37        | 12.57        | 11.13        |              |              |
| Electricity production, Natural gas                                | 12.9 MJ  | 12.18                     | 10.74    | 12.72        | 11.82        | 11.28        | 10.56        | 9.84         | 10.92        | 9.48         | 11.64        | 11.46        | 10.20        | 12.54        | 10.38        | 12.00        | 10.02        | 12.36        | 12.90        | 11.10        | 9.66         |              |              |
| Electricity production, Diesel                                     | 7.25 MJ  | 6.53                      | 5.09     | 7.07         | 6.17         | 5.63         | 4.91         | 4.19         | 5.27         | 3.83         | 5.99         | 5.81         | 4.55         | 6.89         | 4.73         | 6.35         | 4.37         | 6.71         | 7.25         | 5.45         | 4.01         |              |              |
| Electricity production, Residual fuel oil                          | 7.25 MJ  | 6.53                      | 5.09     | 7.07         | 6.17         | 5.63         | 4.91         | 4.19         | 5.27         | 3.83         | 5.99         | 5.81         | 4.55         | 6.89         | 4.73         | 6.35         | 4.37         | 6.71         | 7.25         | 5.45         | 4.01         |              |              |
| <b><i>Renewable Energy Sources</i></b>                             |          | <b>29.5</b>               | <b>%</b> | <b>33.82</b> | <b>42.45</b> | <b>30.58</b> | <b>35.97</b> | <b>39.21</b> | <b>43.53</b> | <b>47.84</b> | <b>41.37</b> | <b>50.00</b> | <b>37.05</b> | <b>38.13</b> | <b>45.68</b> | <b>31.66</b> | <b>44.61</b> | <b>34.89</b> | <b>46.76</b> | <b>32.74</b> | <b>29.50</b> | <b>40.29</b> | <b>48.92</b> |
| Electricity production, Hydroelectric power plant                  | 13.6 MJ  | 14.46                     | 16.19    | 13.82        | 14.89        | 15.54        | 16.41        | 17.27        | 15.97        | 17.70        | 15.11        | 15.33        | 16.84        | 14.03        | 16.62        | 14.68        | 17.05        | 14.25        | 13.60        | 15.76        | 17.48        |              |              |
| Electricity production, Solar                                      | 5.45 MJ  | 6.31                      | 8.04     | 5.67         | 6.74         | 7.39         | 8.26         | 9.12         | 7.82         | 9.55         | 6.96         | 7.18         | 8.69         | 5.88         | 8.47         | 6.53         | 8.90         | 6.10         | 5.45         | 7.61         | 9.33         |              |              |
| Electricity production, Wind power at wind turbine                 | 1.65 MJ  | 2.51                      | 4.24     | 1.87         | 2.94         | 3.59         | 4.46         | 5.32         | 4.02         | 5.75         | 3.16         | 3.38         | 4.89         | 2.08         | 4.67         | 2.73         | 5.10         | 2.30         | 1.65         | 3.81         | 5.53         |              |              |
| Electricity production, geothermal                                 | 7 MJ     | 7.86                      | 9.59     | 7.22         | 8.29         | 8.94         | 9.81         | 10.67        | 9.37         | 11.10        | 8.51         | 8.73         | 10.24        | 7.43         | 10.02        | 8.08         | 10.45        | 7.65         | 7.00         | 9.16         | 10.88        |              |              |
| Electricity production, biomass                                    | 1.8 MJ   | 2.66                      | 4.39     | 2.02         | 3.09         | 3.74         | 4.61         | 5.47         | 4.17         | 5.90         | 3.31         | 3.53         | 5.04         | 2.23         | 4.82         | 2.88         | 5.25         | 2.45         | 1.80         | 3.96         | 5.68         |              |              |

Table S6. Endpoint damage indicator characterisation or aggregation for all scenarios

| Endpoint level damage indicators | Unit       | Scenario 1             | Scenario 2             | Scenario 3             |
|----------------------------------|------------|------------------------|------------------------|------------------------|
| Human health                     | DALY       | 0.0237                 | 0.0238                 | 0.0155                 |
| Ecosystem                        | species-yr | $5.26 \times 10^{-07}$ | $5.41 \times 10^{-07}$ | $3.16 \times 10^{-07}$ |
| Resources                        | USD2013    | 0.1371                 | 0.2663                 | -5.7670                |

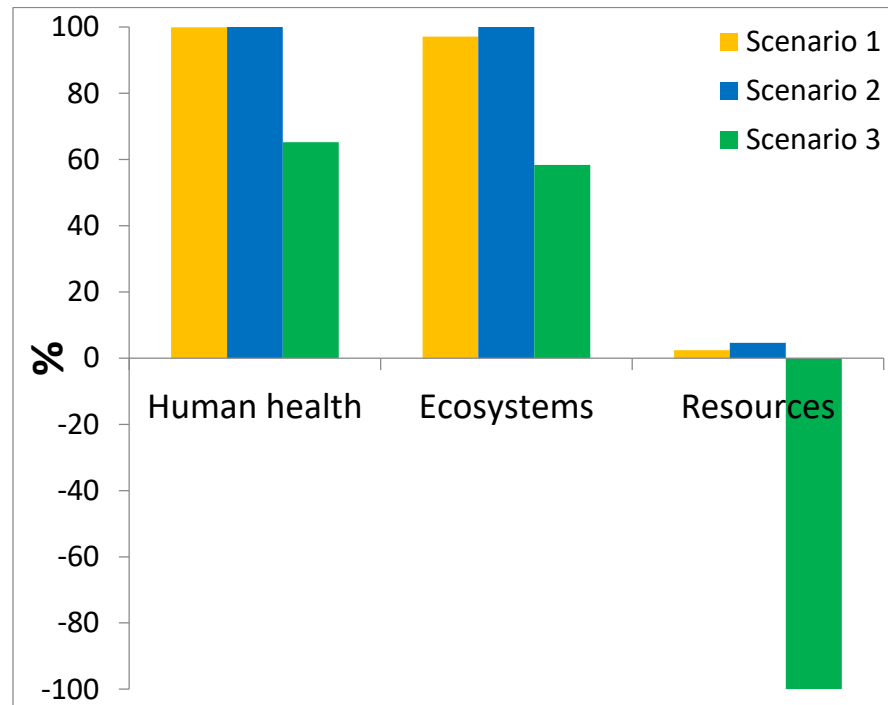

Figure S4. Environmental impact assessment-endpoint damage level normalisation for Scenario 1, Scenario 2, and Scenario 3
